# Supplementary material for: Nanomagnetic tetraaza (N4 donor) macrocyclic Schiff base complex of copper(ii): synthesis, characterizations, and its catalytic application in Click reactions
Source: Royal Society of Chemistry journal article supplement (doi:10.1039/d3na00580a), 2023-01-01
Supplement: d3na00580a1.pdf [file d3na00580a1.pdf]

## Supporting Information

### Nanomagnetic Tetraaza (N<sub>4</sub> Donor) Macrocyclic Schiff Base Complex of Copper(II): Synthesis, Characterizations, and Its Catalytic Application in Click Reaction

Masoomeh Norouzi <sup>a,\*</sup>, Nasim Noormoradi<sup>a</sup>, Masoud Mohammadi <sup>a</sup>

<sup>a</sup>*Department of Chemistry, Faculty of Science, Ilam University, P.O. Box 69315516, Ilam, Iran*

\* Correspondence to: (M. Norouzi), Ilam University, Ilam, Iran, E-mail: [m.norouzi@ilam.ac.ir](mailto:m.norouzi@ilam.ac.ir)

**Figure S1.** <sup>1</sup>H NMR of 5-Phenyltetrazole

**Figure S2.** <sup>1</sup>H NMR of 5-p-Tolyl-1H-tetrazole.

**Figure S3.** <sup>1</sup>H NMR of 5-(4-Trifluoromethyl-phenyl)-1H-tetrazole

**Figure S4.** <sup>1</sup>H NMR of 5-(4-Nitrophenyl)tetrazole.

**Figure S5.** <sup>1</sup>H NMR of 5-(2-Fluoro-phenyl)-1H-tetrazole

**Figure S6.** <sup>1</sup>H NMR of 5-(2-Chlorophenyl)tetrazole.

**Figure S7.** <sup>1</sup>H NMR of 5-(4-Chlorophenyl)tetrazole.

**Figure S8.** <sup>1</sup>H NMR of 5-(4-Bromo-phenyl)-1H-tetrazole.

**Figure S9.** <sup>1</sup>H NMR of 4-(1H-Tetrazol-5-yl)-phenol.

**Figure S10.** <sup>1</sup>H NMR of 2-(1H-Tetrazol-5-yl)-benzotrile.

**Figure S11.** The reaction mixture before and after of catalyst separation via a magnetism.

## Supporting Information

### Spectral Data:

#### 5-Phenyltetrazole (Table 2, entry 1):

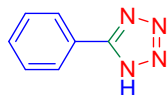

Yield = 98%; M.P.= (215-217 °C Found, 211-214°C Reported);  $^1\text{H NMR}$  (400 MHz, DMSO- $d_6$ ),  $\delta$  (ppm): 16.92 (s, 1H), 8.03 (dd,  $J$  = 6.5, 3.3 Hz, 2H), 7.60 (dd,  $J$  = 5.1, 2.1 Hz, 3H).

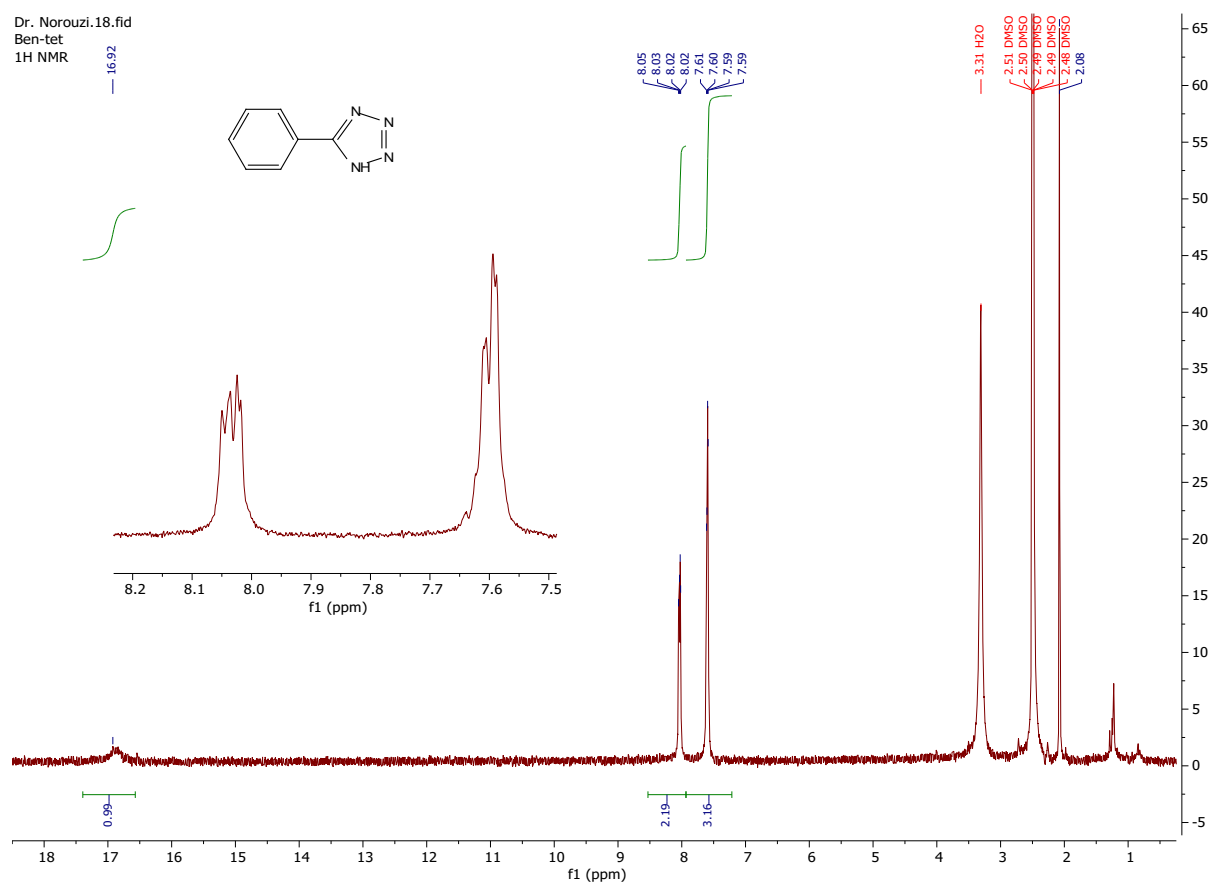

Figure S1.  $^1\text{H NMR}$  of 5-Phenyltetrazole.

#### 5-p-Tolyl-1H-tetrazole (Table 2, entry 2):

## Supporting Information

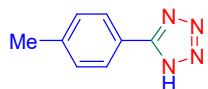

Yield = 93%; M.P.= (294-251 °C Found, 252-254°C Reported);  $^1\text{H}$  NMR (400 MHz, DMSO- $d_6$ ),  $\delta$  (ppm): 16.68 (s, 1H), 7.93-7.89 (d,  $J$  = 8 Hz, 2H), 7.42-7.38 (d,  $J$  = 8 Hz, 2H), 2.38 (s, 3H).

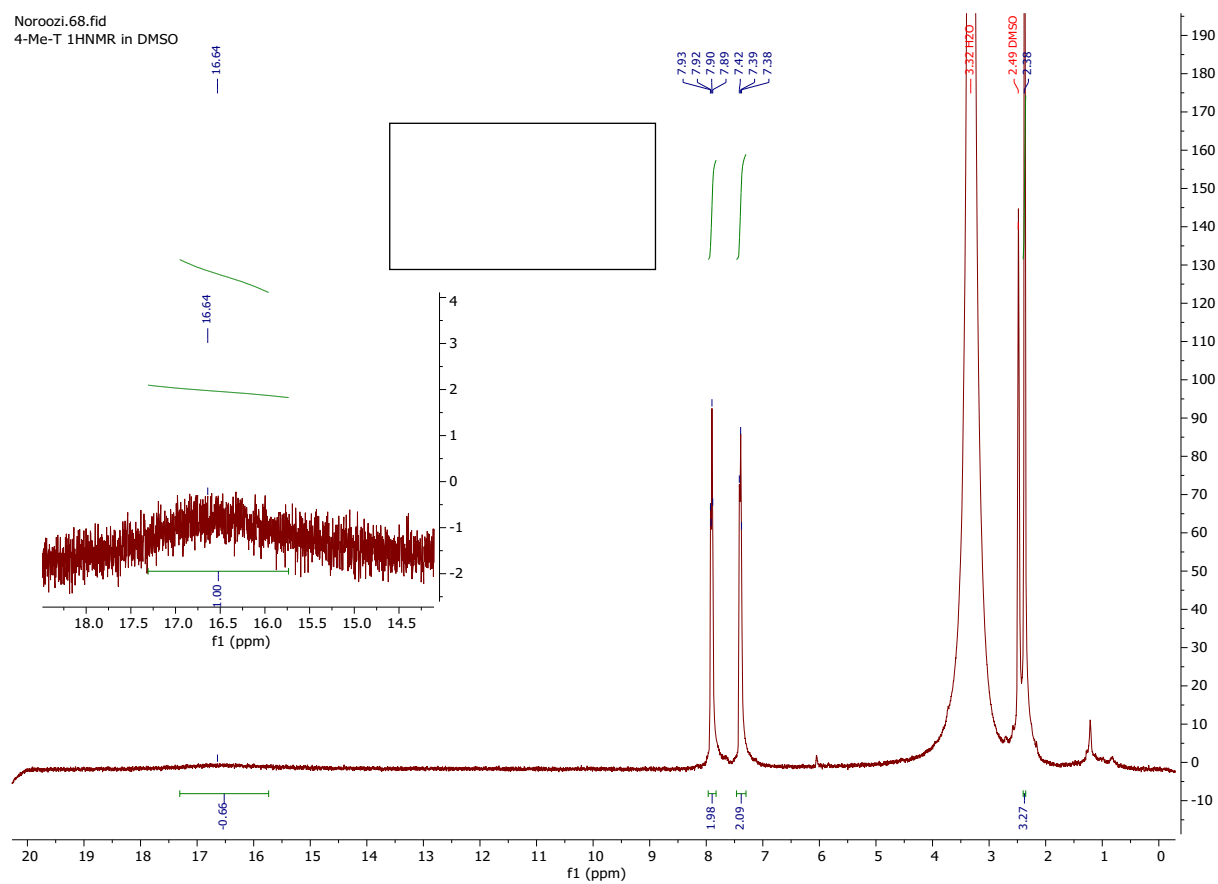

Figure S2.  $^1\text{H}$  NMR of 5-p-Tolyl-1H-tetrazole.

## Supporting Information

### 5-(4-Trifluoromethyl-phenyl)-1H-tetrazole (Table 2, entry 3):

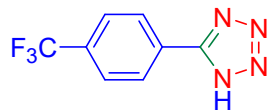

Yield = 96%; M.P.= (221-222 °C Found, 218-219°C Reported);  $^1\text{H}$  NMR (400 MHz, DMSO- $d_6$ ),  $\delta$  (ppm): 8.35-8.33 (d,  $J$  = 8 Hz, 2H), 7.98-7.95 (d,  $J$  = 8 Hz, 1H), 7.88-7.83 (t, 1H).

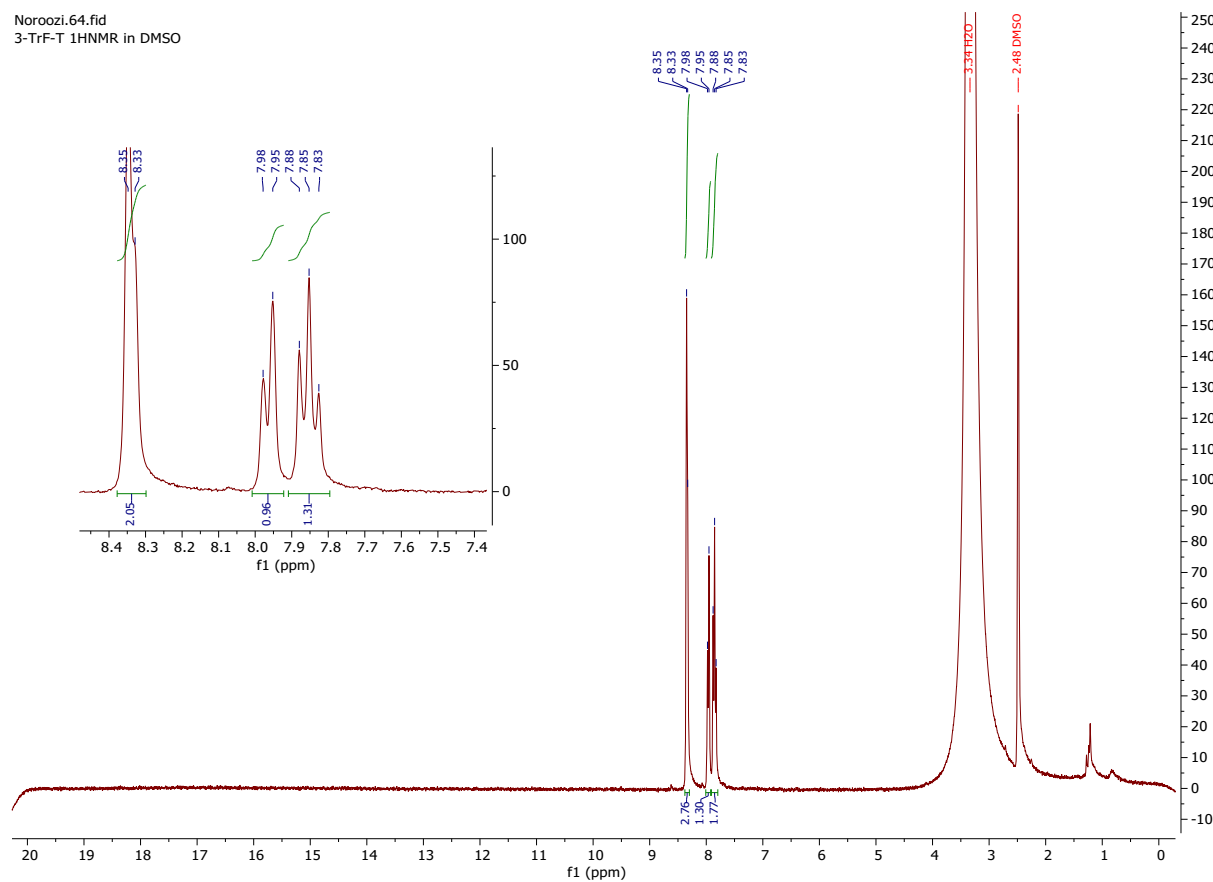

Figure S3.  $^1\text{H}$  NMR of 5-(4-Trifluoromethyl-phenyl)-1H-tetrazole

## Supporting Information

### 5-(4-Nitrophenyl)tetrazole (Table 2, entry 5):

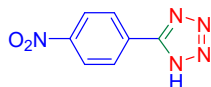

Yield = 93%; M.P.= (219-220 °C Found, 217-220°C Reported);  $^1\text{H}$  NMR (400 MHz, DMSO- $d_6$ ),  $\delta$  (ppm): 8.46-8.81 (d,  $J = 8$  Hz, 2H), 8.52 – 8.33 (m, 2H).

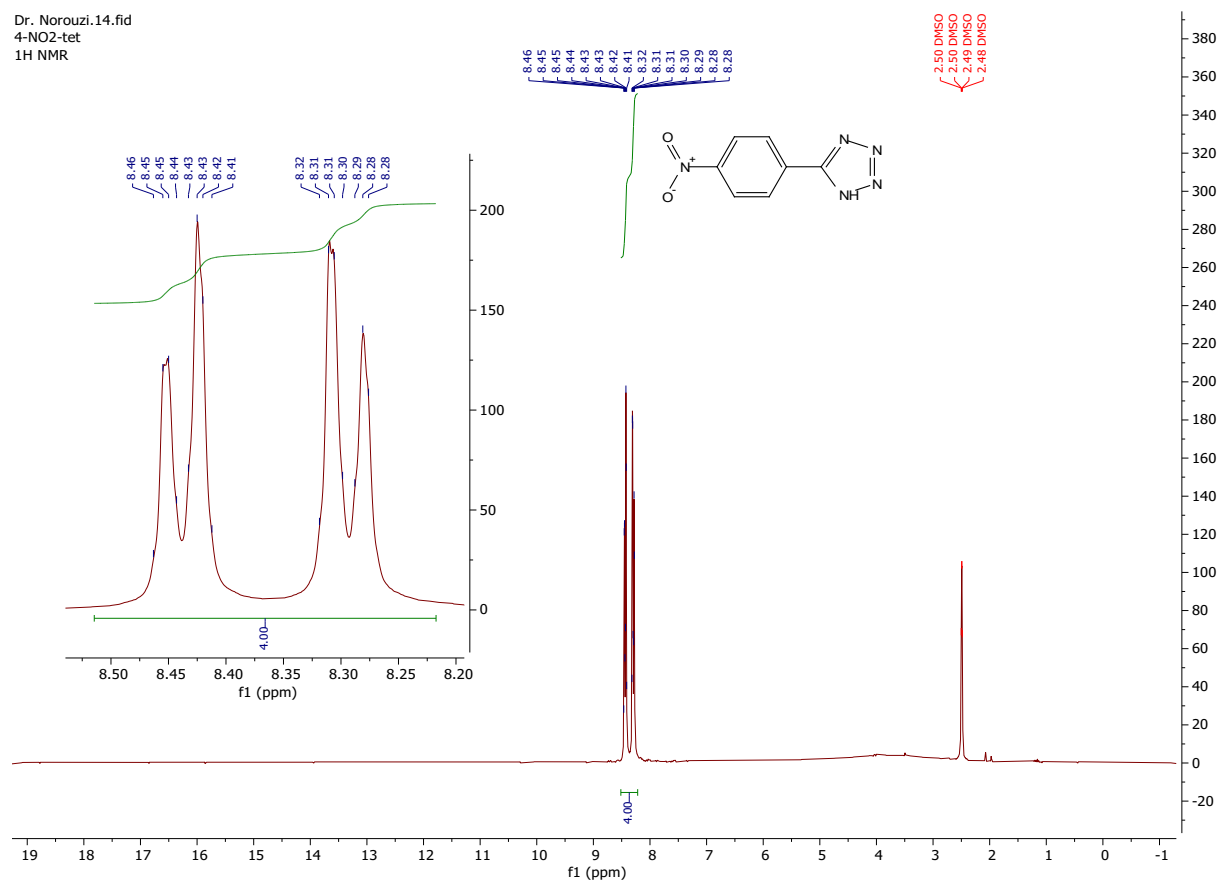

Figure S4.  $^1\text{H}$  NMR of 5-(4-Nitrophenyl)tetrazole.

## Supporting Information

### 5-(2-Fluoro-phenyl)-1H-tetrazole (Table 2, entry 6):

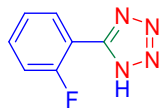

Yield = 95%; M.P.= (157-159 °C Found, 158-160°C Reported);  $^1\text{H}$  NMR (400 MHz, DMSO- $d_6$ ),  $\delta$  (ppm): 16.86 (b, 1H (N-H)), 8.07 (s, 1H), 7.67-7.64 (d,  $J = 8$  Hz, 1H), 7.52-7.41 (m, 2H)

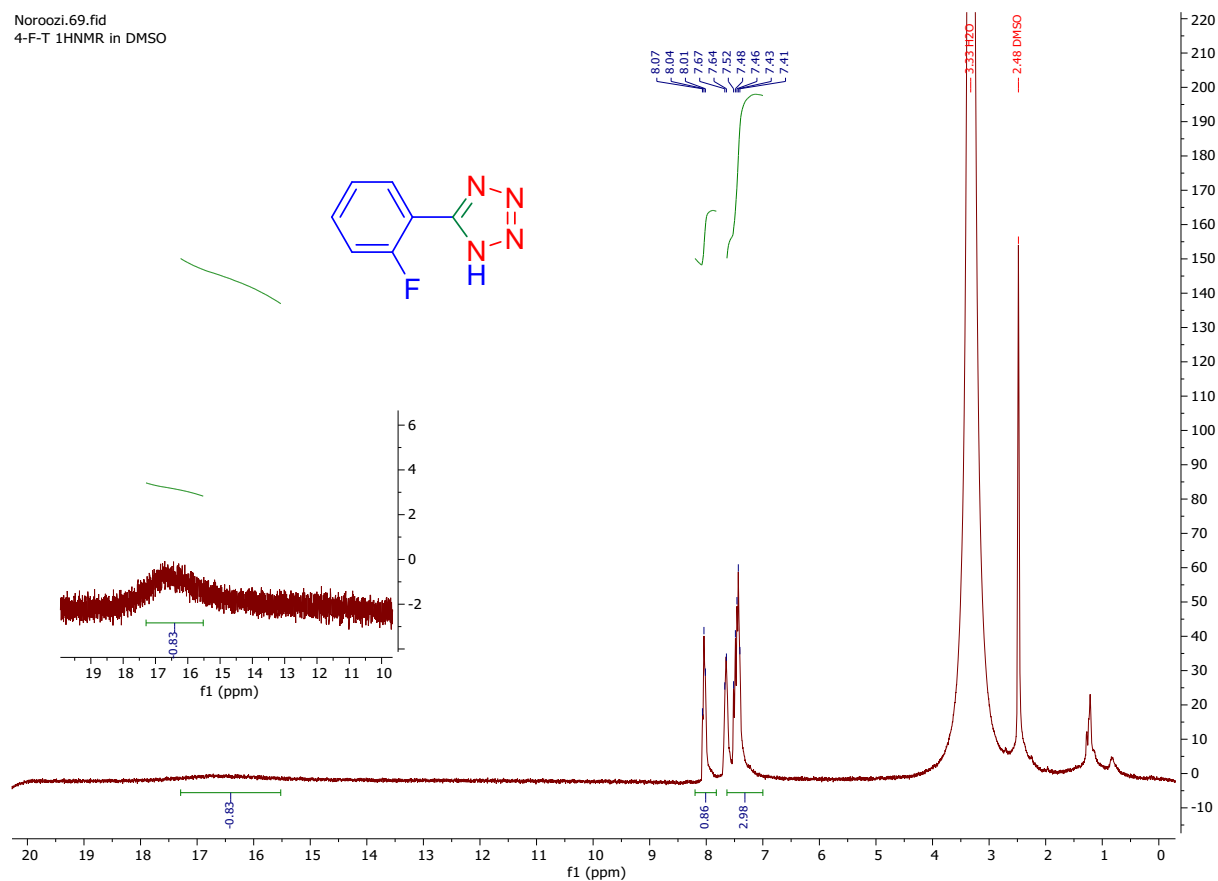

Figure S5.  $^1\text{H}$  NMR of 5-(2-Fluoro-phenyl)-1H-tetrazole

## Supporting Information

### 5-(2-Chlorophenyl)tetrazole (Table 2, entry 7):

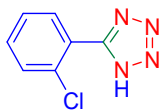

Yield = 93%; M.P. = (179-180 °C Found, 180-181 °C Reported);  $^1\text{H NMR}$  (400 MHz, DMSO- $d_6$ ),  $\delta$  (ppm): 16.88 (b, 1H(N-H)), 8.01 (s, 1H), 7.82-7.79 (d,  $J = 8$  Hz, 1H), 7.73-7.72 (d,  $J = 8$  Hz, 1H), 7.63- 7.55 (m, 1H).

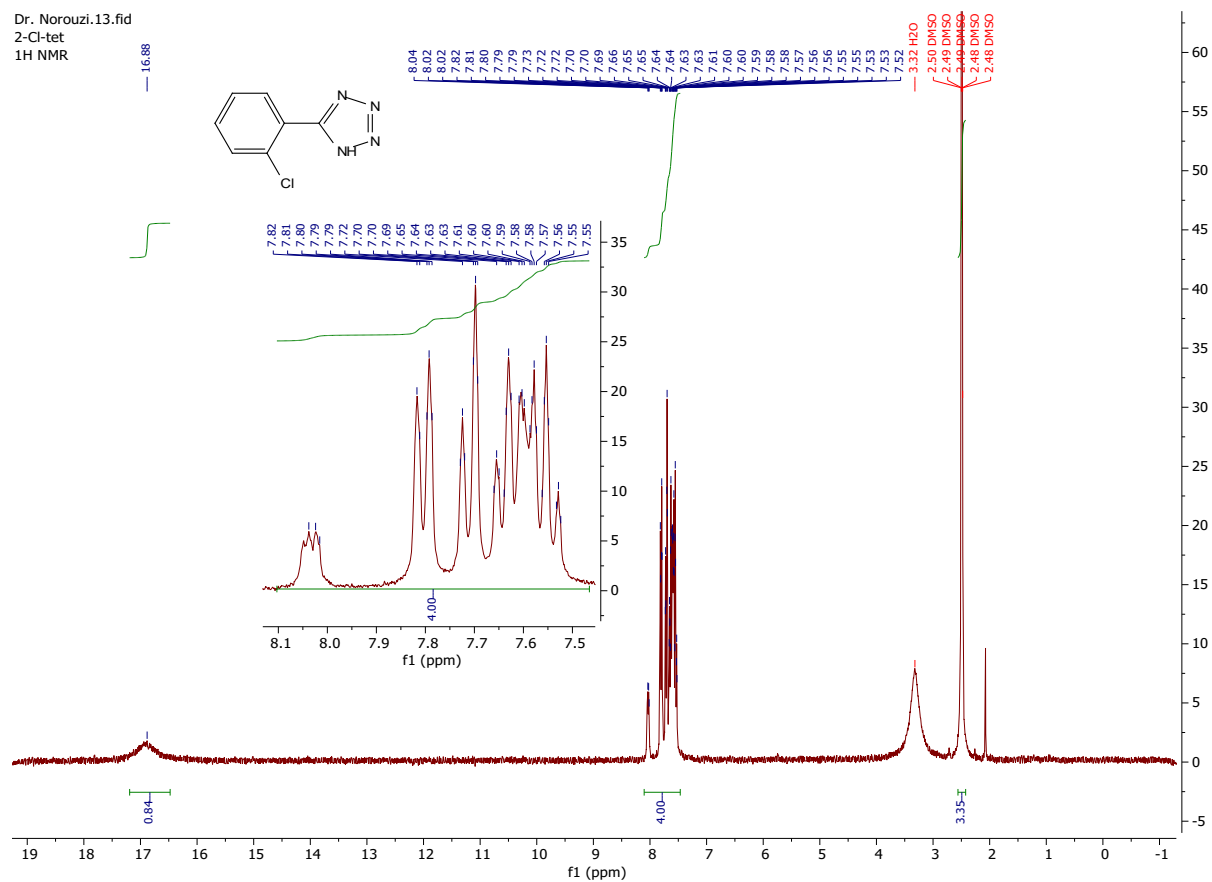

Figure S6.  $^1\text{H NMR}$  of 5-(2-Chlorophenyl)tetrazole.

## Supporting Information

### 5-(4-Chloro-phenyl)-1H-tetrazole (Table 2, entry 8):

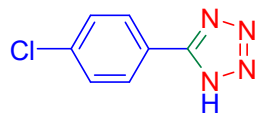

Yield = 94%; M.P. = (252-254 °C Found, 261-263 °C Reported);  $^1\text{H}$  NMR (400 MHz, DMSO- $d_6$ ),  $\delta$  (ppm): 16.89 (b, 1H (N-H)), 8.07 (s, 1H), 8.05-8.02 (d,  $J = 8$  Hz, 2H), 7.70-7.66 (d,  $J = 8$  Hz, 2H).

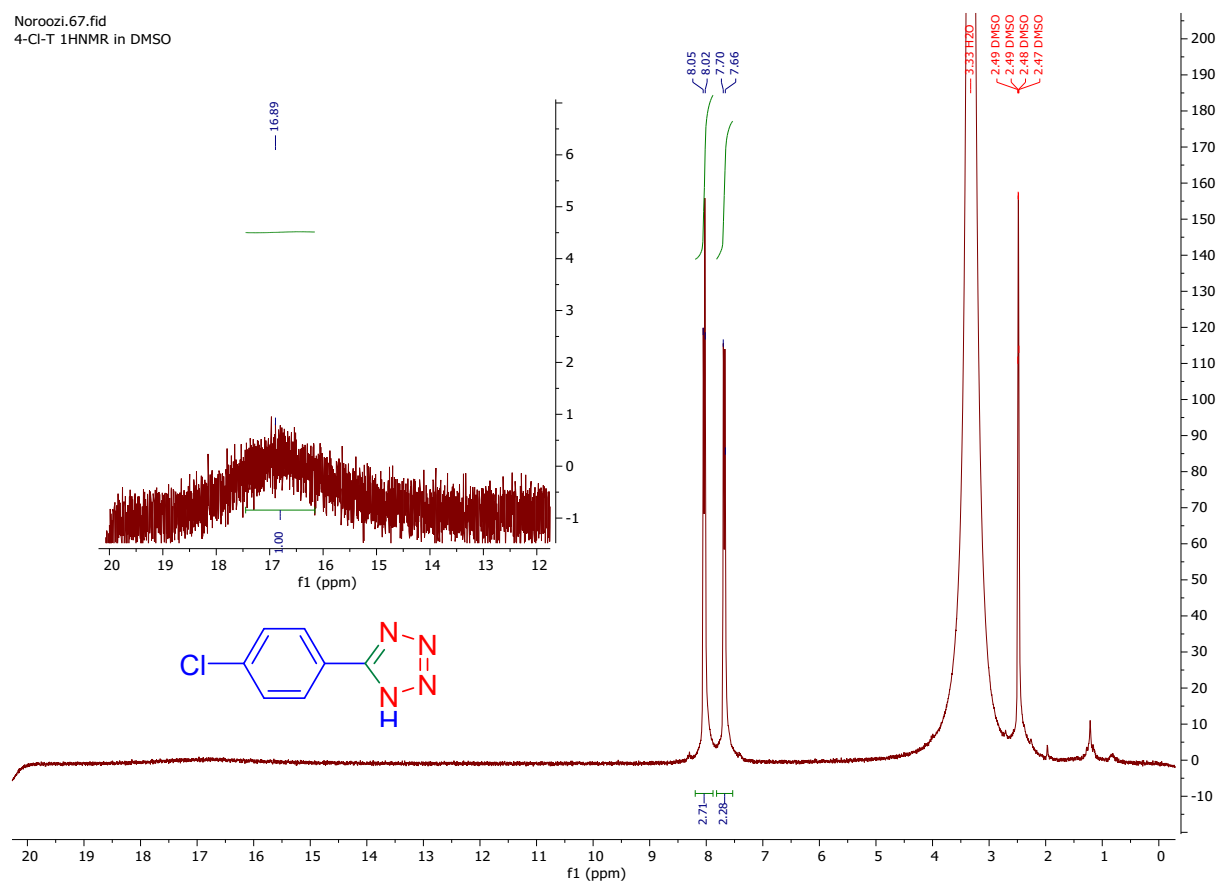

Figure S7.  $^1\text{H}$  NMR of 5-(4-Chlorophenyl)tetrazole.



## Supporting Information

### 5-(4-Bromo-phenyl)-1H-tetrazole (Table 2, entry 9):

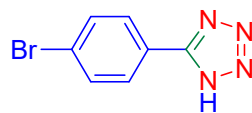

Yield = 96%; M.P. = (264-266 °C Found, 268-269°C Reported);  $^1\text{H}$  NMR (400 MHz, DMSO- $d_6$ ),  $\delta$  (ppm): 7.98-7.95 (d,  $J$  = 8 Hz, 2H), 7.83-7.80 (d,  $J$  = 8 Hz, 2H).

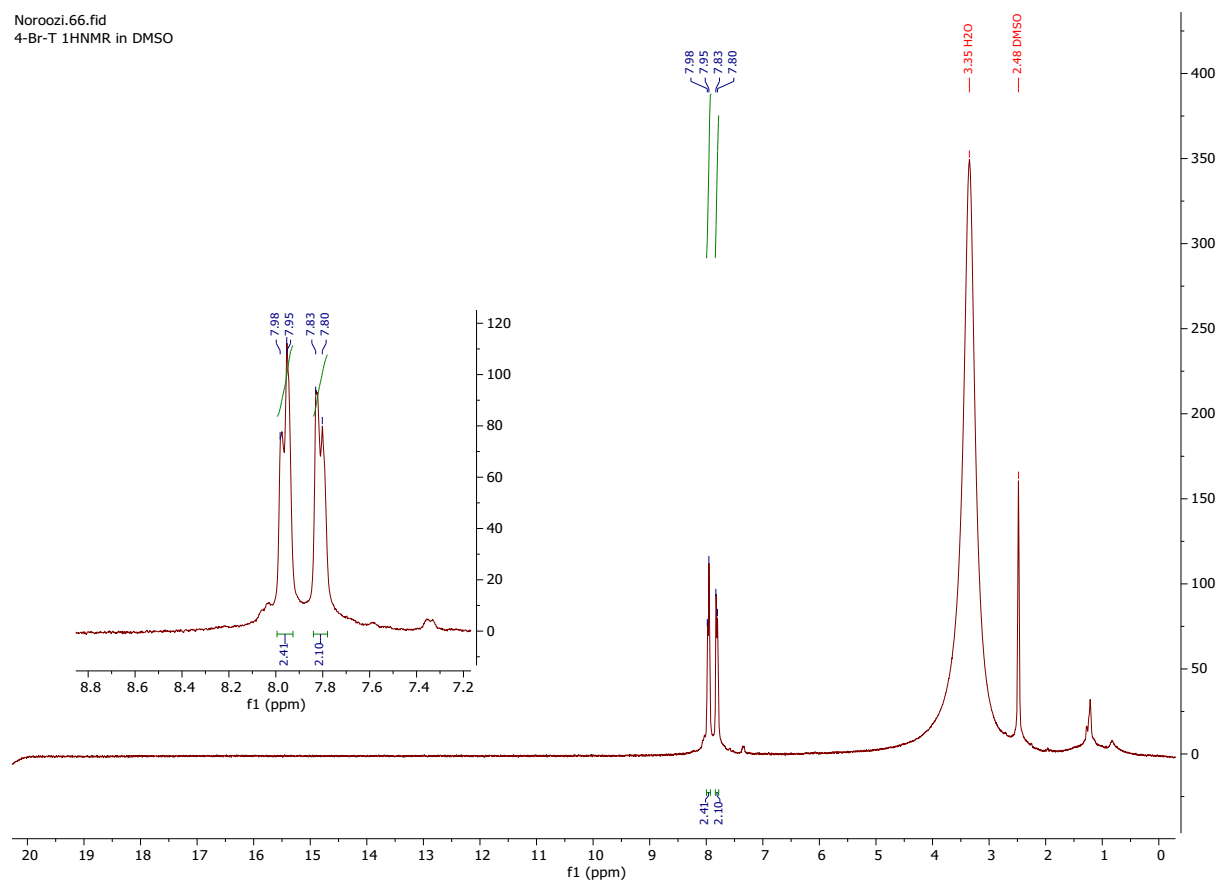

Figure S8.  $^1\text{H}$  NMR of 5-(4-Bromo-phenyl)-1H-tetrazole.

## Supporting Information

### 4-(1H-Tetrazol-5-yl)-phenol (Table 2, entry 11):

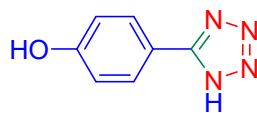

Yield = 95%; M.P. = (234-236 °C Found, 233-235 °C Reported);  $^1\text{H}$  NMR (400 MHz, DMSO- $d_6$ ),  $\delta$  (ppm): 10 (br, 1H, OH), 7.86-7.83 (d,  $J$  = 8 Hz, 2H), 6.95-6.98 (d,  $J$  = 8 Hz, 2H).

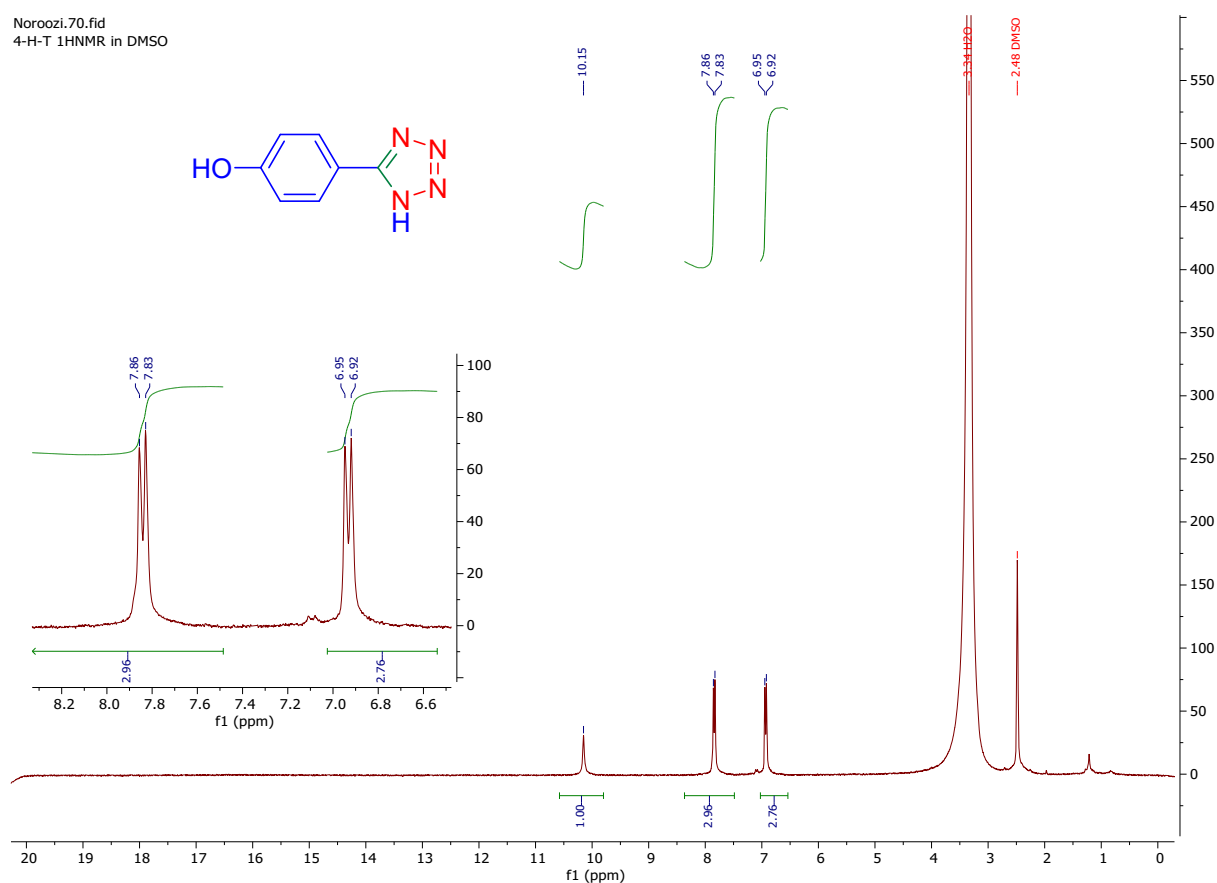

**Figure S9.**  $^1\text{H}$  NMR of 4-(1H-Tetrazol-5-yl)-phenol.

## Supporting Information

### 2-(1H-Tetrazol-5-yl)-benzonitrile (Table 2, entry 12):

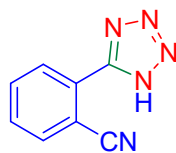

Yield = 94%; M.P.= (211-213 °C Found, 209-211°C Reported);  $^1\text{H}$  NMR (400 MHz, DMSO- $d_6$ ),  $\delta$  (ppm): 8.19- 8.06 (m, 2H), 7.95-7.90 (t,  $J$  = 8 Hz, 1H), 7.80-7.75 (t,  $J$  = 8 Hz, 1H).

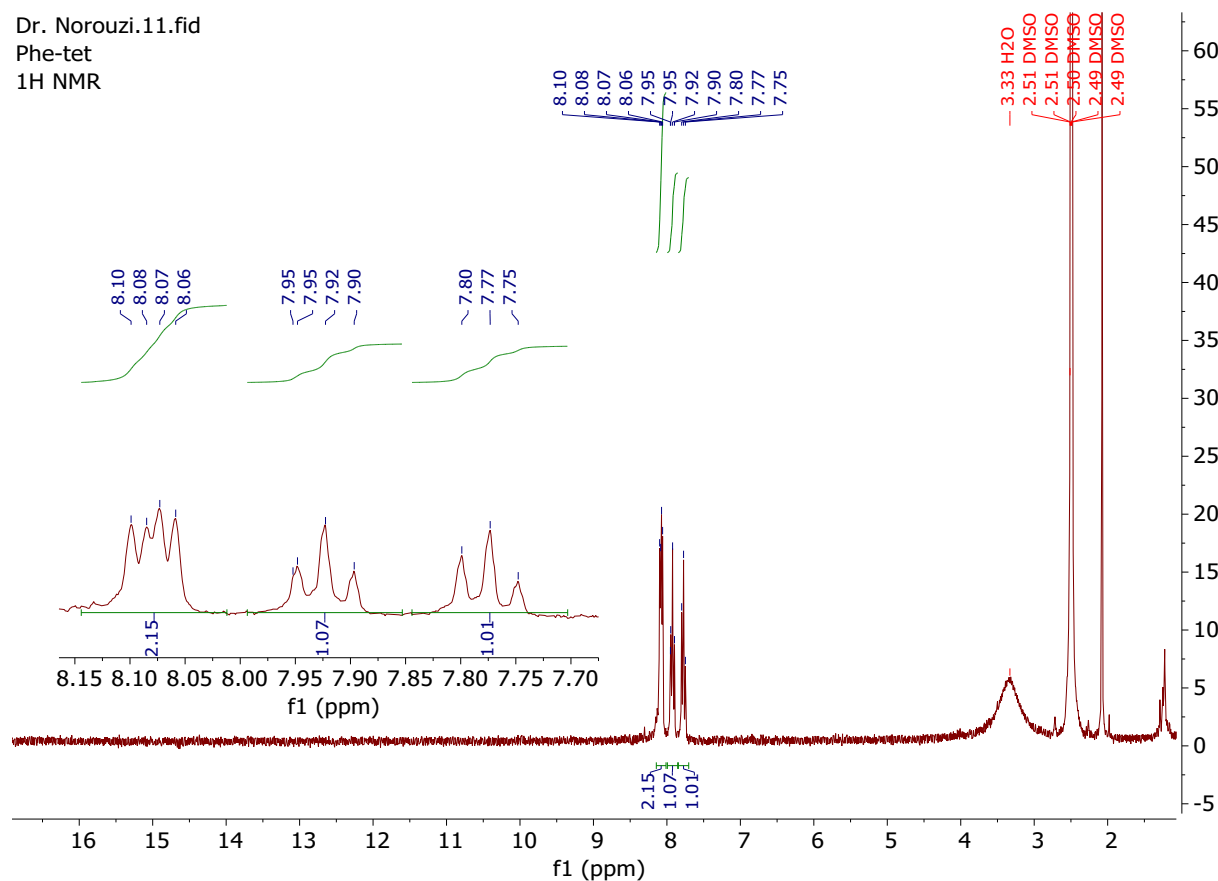

Figure S10.  $^1\text{H}$  NMR of 2-(1H-Tetrazol-5-yl)-benzonitrile.

## Supporting Information

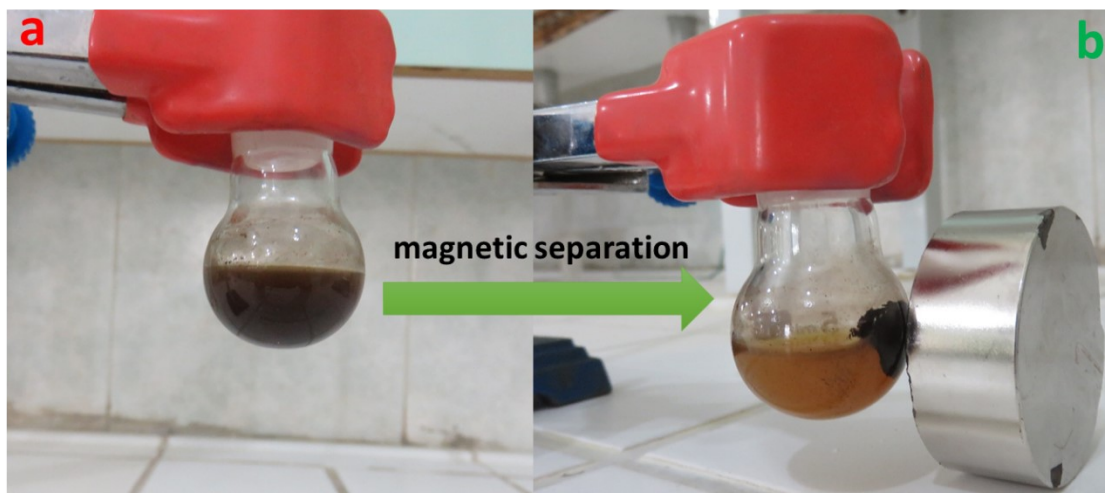

**Figure S11.** The reaction mixture a) before and b) after of catalyst separation via a magnetism.
